# Supplementary material
Source: PubMed Central journal article supplement (PMC3518585)
Supplement: NIHMS396967-supplement-1_si_001.pdf [file NIHMS396967-supplement-1_si_001.pdf]

## Supporting Information

### Detection and Kinetic Characterization of a Highly Reactive Heme–Thiolate Peroxygenase Compound I

Xiaoshi Wang,<sup>†</sup> Sebastian Peter,<sup>‡</sup> Matthias Kinne,<sup>‡</sup> Martin Hofrichter,<sup>‡</sup> and John T. Groves<sup>\*†</sup>

<sup>†</sup>Department of Chemistry, Princeton University, Princeton, New Jersey, 08544, United States

<sup>‡</sup>Department of Bio- and Environmental Sciences, International Graduate School of Zittau, Zittau, 02763, Germany

#### Materials

Wild-type extracellular aromatic peroxygenase of *A. aegerita* (isoform II, pI 5.6, 46 kDa) was produced in stirred-tank bioreactors with a soybean-flour suspension as growth substrate, and purified as described previously.<sup>1</sup> The enzyme preparation was homogeneous by SDS/PAGE, and exhibited an  $A_{418\text{ nm}}/A_{280\text{ nm}}$  ratio of 1.7. The specific activity of the peroxygenase was 59 U/mg, where 1 U represents the oxidation of 1  $\mu\text{mol}$  of 3,4-dimethoxybenzyl alcohol to 3,4-dimethoxybenzaldehyde in 1 min at room temperature. *m*CPBA (3-chloroperoxybenzoic acid) was obtained from Aldrich and purified by stirring in 100 mM pH 7.4 phosphate buffer for 1 h followed by filtering and washing thoroughly with water. *p*-Isopropylbenzoic acid, *p*-ethylbenzoic acid, *p*-toluic acid, THF, THF-*d*<sub>8</sub>, cycloheptanecarboxylic acid, cyclopentanecarboxylic acid, cyclohexanecarboxylic acid, 1,4-dioxane, 2,2-dimethylbutyric acid were obtained from Aldrich and purified by recrystallization or distillation under vacuum. D<sub>2</sub>O was obtained from Cambridge Isotope Laboratories, Inc. Water used in all experiments was de-ionized (Millipore, Milli-Q). Buffer solutions were prepared by mixing sodium citrate and citric acid in water and adjusted with NaOH. Phosphate-citrate buffer was prepared by mixing 0.2 M dibasic potassium phosphate with 0.1 M citric acid and the pH was adjusted with KOH.

#### Instrumentation

UV-vis spectral measurements were made with a Hewlett Packed 8453 diode array spectrophotometer at room temperature. Stopped-flow experiments were performed with a Hi-Tech SF-61 DX2 double mixing instrument with a 1 cm path length equipped with an ISOTEMP 3013 D thermostat bath. NMR spectra were recorded on a 500 MHz Bruker Avance II spectrometer. GC-MS analyses were run using an Agilent 7890A GC coupled to a 5975 Inert MSD with a Rtx-5Sil MS column.

#### Reaction Kinetics

Kinetic data were collected at 4 °C in 100 mM buffer, citrate buffer for pH 5.0 and phosphate-citrate buffer for pH 3.0-7.0. Each experiment was repeated two or three times. Concentrations presented are the final concentrations after mixing. Kinetic data for substrate hydroxylation were obtained in double-mixing mode using either diode array detection or single wavelength mode at 417 nm. Values of  $k_1$  were obtained by the fitting of initial rates with a series of *m*CPBA concentrations. Values of  $k_{\text{obs}}$  were processed by fitting the kinetic

profile to a single exponential equation using Kinetic Studio from Hi-Tech. Values of  $k_2$  were obtained from the slope of a  $k_{\text{obs}}$  vs. the [substrate] plot. SVD and global analyses were analyzed by ReactLab<sup>TM</sup> Kinetics from Jplus Consulting.

**Figure S1.** Absorbance traces at 417 nm upon mixing of ferric enzyme with 2 equiv of *m*CPBA over a range of pH.

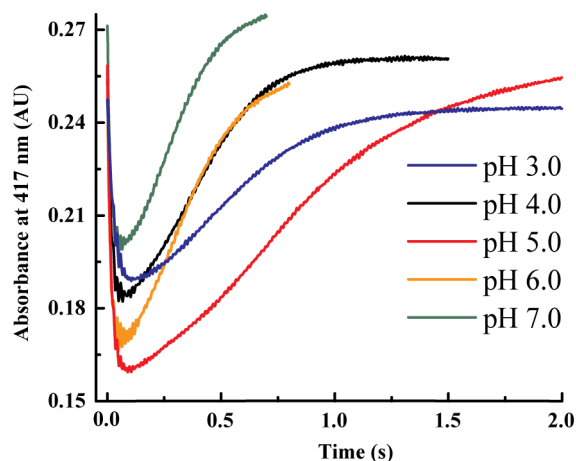

**Figure S2.** Water suppressed <sup>1</sup>H-NMR of the reaction mixture of oxidation of *p*-ethylbenzoic acid by 0.22 μM of *Aae*APO and H<sub>2</sub>O<sub>2</sub>. Labeled resonances correspond to the product (*R*)-4-(1-hydroxyethyl)benzoic acid at 7.748 ppm (2H, dd), 7.330 ppm (2H, dd) and 1.368 ppm (3H, d). The benzylic proton resonance was obscured by the suppressed water peak.

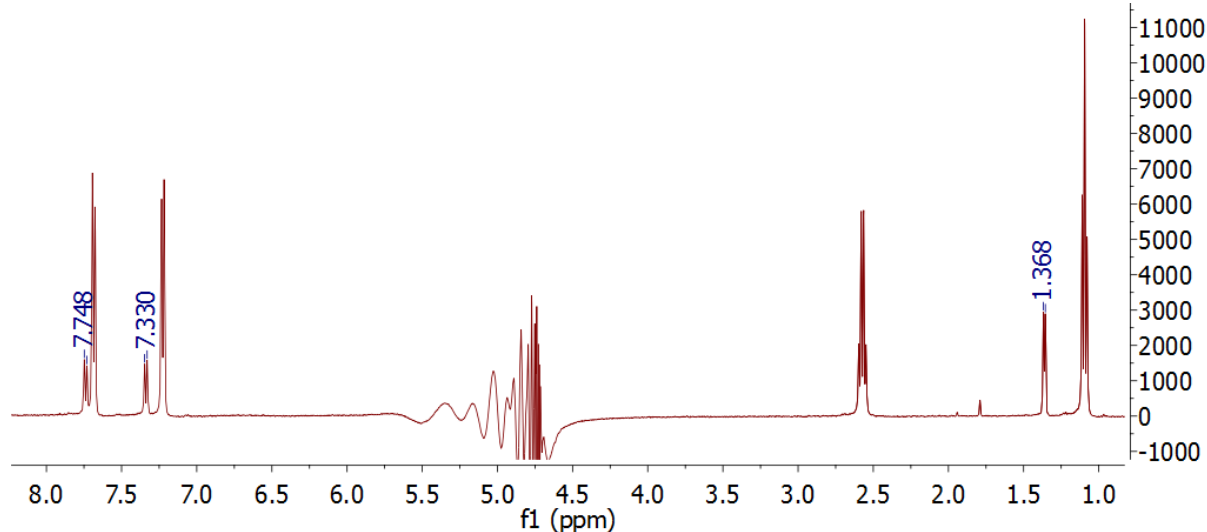

**Figure S3.** Rate constants for the hydrogen abstraction by  $\text{MnO}_4^-$ ,  $\text{ROO}\cdot$ ,  $\text{RO}\cdot$  and  $\text{HO}\cdot$  vs. the strength of the O-H bonds formed for toluene (solid circles) and *p*-ethylbenzene (open diamonds).<sup>2</sup> Plotting rate constants for hydrogen abstraction by *Aae*APO-I with *p*-toluic acid and *p*-ethylbenzoic acid on the curves gives an  $\text{Fe}^{\text{IV}}\text{O-H}$  bond strength of about 103 kcal/mol.

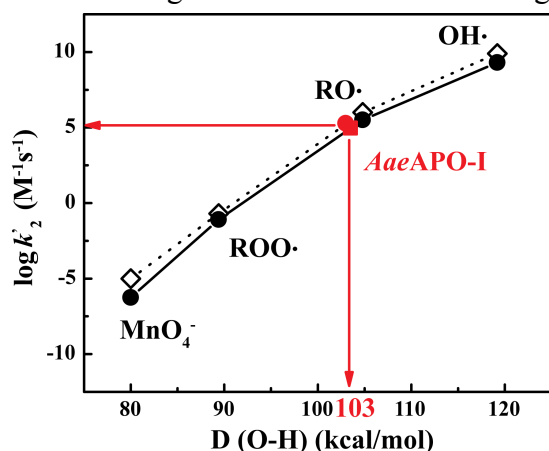

**Table S1. Summary of all substrates, equivalent C-H bonds, BDE,  $k_2$ ,  $k_2'$  and  $\log k_2'$ .**

| Number | Substrates                      | Equivalent C-H Bonds* | BDE (kcal/mol) | $k_2$ ( $\text{M}^{-1}\text{s}^{-1}$ ) | $k_2'^{**}$ ( $\text{M}^{-1}\text{s}^{-1}$ ) | $\log k_2'$ ( $\text{M}^{-1}\text{s}^{-1}$ ) |
|--------|---------------------------------|-----------------------|----------------|----------------------------------------|----------------------------------------------|----------------------------------------------|
| 1      | <i>p</i> -Isopropylbenzoic acid | 1                     | 83             | 2.0<br>( $\pm 0.09$ ) $\times 10^5$    | $2.0 \times 10^5$                            | 5.3                                          |
| 2      | <i>p</i> -Ethylbenzoic acid     | 2                     | 85.5           | $3.9 (\pm 0.2) \times 10^5$            | $1.9 \times 10^5$                            | 5.3                                          |
| 3      | <i>p</i> -Toluic acid           | 3                     | 90             | $2.8 (\pm 0.2) \times 10^5$            | $9.3 \times 10^4$                            | 5.0                                          |
| 4      | THF                             | 4                     | 92             | 1.7<br>( $\pm 0.05$ ) $\times 10^4$    | $4.3 \times 10^3$                            | 3.6                                          |
| 4'     | THF- <i>d</i> <sub>8</sub>      | 4                     |                | $4.0 (\pm 0.1) \times 10^3$            |                                              |                                              |
| 5      | Cycloheptane Carboxylic acid    | 4                     | 94             | $3.0 (\pm 0.1) \times 10^4$            | $7.5 \times 10^3$                            | 3.9                                          |
| 6      | Cyclopentane Carboxylic acid    | 8                     | 95.6           | $1.0 (\pm 0.1) \times 10^4$            | $1.3 \times 10^3$                            | 3.1                                          |
| 7      | Cyclohexane Carboxylic acid     | 6                     | 99             | $1.0 (\pm 0.2) \times 10^4$            | $1.7 \times 10^3$                            | 3.2                                          |
| 8      | 1,4-Dioxane                     | 8                     | 96             | 3.5<br>( $\pm 0.02$ ) $\times 10^2$    | $4.4 \times 10^1$                            | 1.6                                          |
| 9      | 2,2-Dimethylbutyric acid        | 9                     | 100            | 6.0<br>( $\pm 0.05$ ) $\times 10^1$    | 6.7                                          | 0.8                                          |

\*The numbers of equivalent C-H bonds were based on the numbers of sites being hydroxylated. \*\*Second-order rate constants  $k_2'$  were adjusted based on the number of equivalent C-H bonds in the substrates.

#### References:

- (1) (a) Ullrich, R.; Nüske, J.; Scheibner, K.; Spantzel, J.; Hofrichter, M. *Appl. Environ. Microbiol.* **2004**, *70*, 4575. (b) Ullrich, R.; Liers, C.; Schimpke, S.; Hofrichter, M. *Biotechnol. J.* **2009**, *4*, 1619.
- (2) (a) Gardner, K. A.; Kuehnert, L. L.; Mayer, J. M. *Inorg. Chem.* **1997**, *36*, 2069. (b) Mayer, J. M. *Acc. Chem. Res.* **1998**, *31*, 441.
